# Supplementary material
Source: PubMed Central journal article supplement (PMC3533393)
Supplement: supp_125.21.5110_JCS108035.pdf [file supp_125.21.5110_JCS108035.pdf]

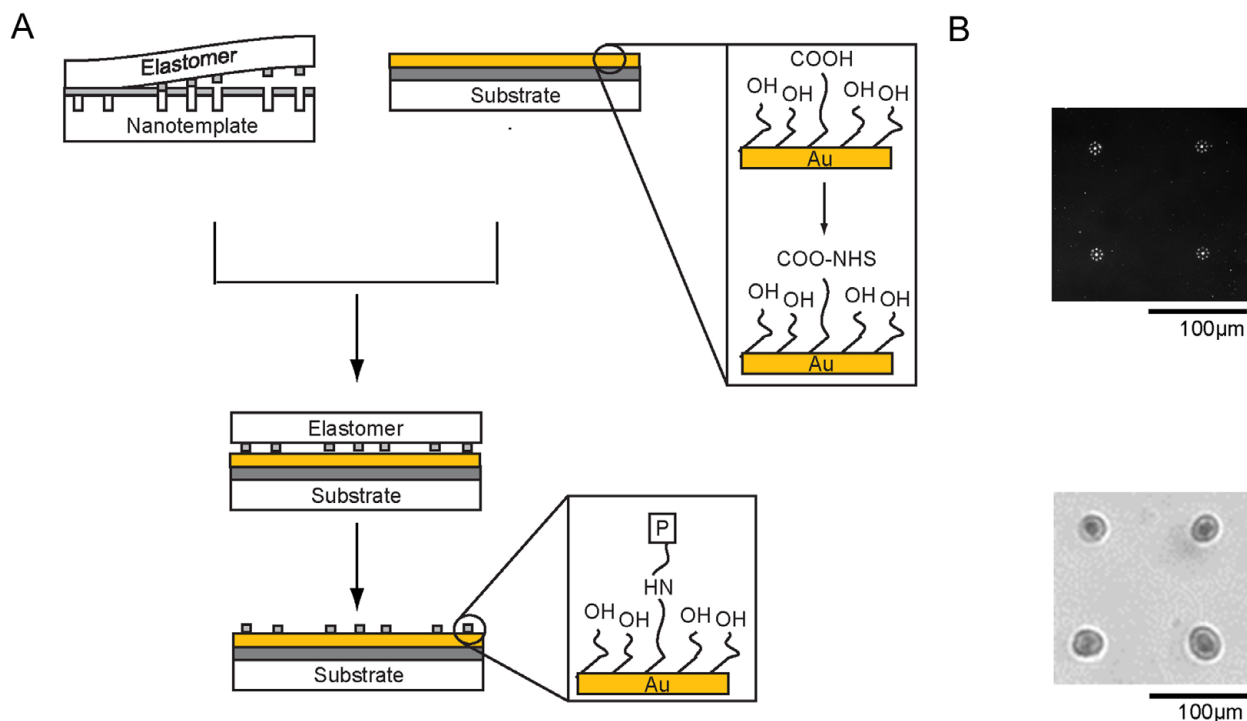

**Fig. S1. Cell adhesive substrates with nanopatterned geometries.** (A) Anchoring groups (COOH) on mixed self-assembled monolayers on gold are activated with EDC/NHS to produce amine-reactive NHS-esters. A flat elastomer stamp uniformly coated with FN is brought into contact with a high-precision nanotemplate to selectively remove FN from the stamp and create the desired FN patterns on the stamp. Pressing the stamp onto the substrates with NHS-esters results in the transfer and tethering of FN molecules onto the substrate. (B) NIH3T3 fibroblasts cultured overnight on nanopatterned substrates attach as single cells and remain rounded (top: fluorescence microscopy image of FN nanopatterns, bottom: phase contrast image of cells).

## Characteristics of adhesion cluster designs analyzed

| Pattern                   | Design                                                                              | Number of Islands per pad | Island size (nm) | Island area ( $\mu\text{m}^2$ ) | Pad Area ( $\mu\text{m}^2$ ) | Total Area ( $\mu\text{m}^2$ ) |
|---------------------------|-------------------------------------------------------------------------------------|---------------------------|------------------|---------------------------------|------------------------------|--------------------------------|
| 1000 nm×1                 | 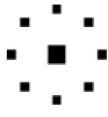   | 1                         | 1000             | 1.00                            | 1.00                         | 12.0                           |
| 500 nm×4                  |    | 4                         | 500              | 0.25                            | 1.00                         | 12.0                           |
| 333 nm×9                  |    | 9                         | 333              | 0.11                            | 1.00                         | 12.0                           |
| 500 nm×1                  |                                                                                     | 1                         | 500              | 0.25                            | 0.25                         | 6.0                            |
| 250 nm×2                  |                                                                                     | 2                         | 250              | 0.06                            | 0.13                         | 5.0                            |
| 250 nm×4                  |                                                                                     | 4                         | 250              | 0.06                            | 0.25                         | 6.0                            |
| 250 nm×9                  |                                                                                     | 9                         | 250              | 0.06                            | 0.56                         | 8.5                            |
| Center only               |    | 0                         | 0                | 0                               | 0                            | 4.0                            |
| 10 $\mu\text{m}$ Diameter |  | N/A                       | N/A              | N/A                             | N/A                          | 78.5                           |

Fig. S2. Characteristics of adhesion cluster designs analyzed.

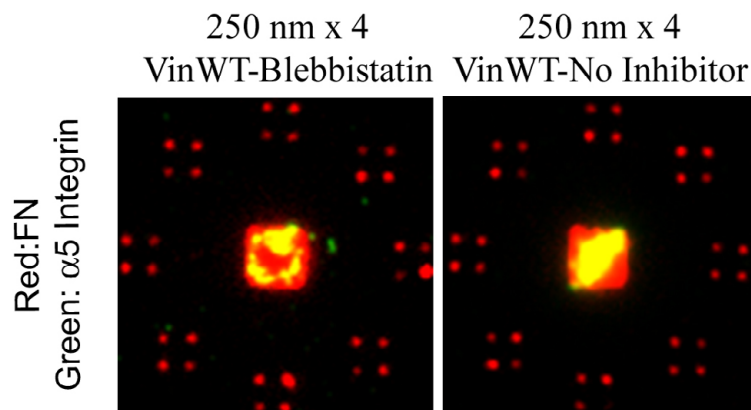

Fig. S3. Blebbistatin treatment (20  $\mu\text{M}$ , 60 min prior to analysis) has no effect on the lack of assembly of integrin-FN clusters on 250 nm islands for cells expressing wild-type vinculin. Fluorescence microscopy images for integrin binding (green) to FN (red) adhesive zones on 250 nm×4 patterns; scale bar: 1  $\mu\text{m}$ .
